# Supplementary material
Source: publisher site journal article supplement (http://scielo.br/pdf/rmat/v22s1/1517-7076-rmat-22-suppl-e11927.pdf)
Supplement: Supplementary file 1 [file 1517-7076-rmat-22-suppl-e11927.pdf]

## Inibidores de corrosão naturais - Proposta de obtenção de produtos ecológicos de baixo custo a partir de resíduos industriais

Natural corrosion inhibitors - Proposal to obtain ecological products of low cost from industrial waste

Janaina Cardozo da Rocha <sup>1</sup>,  
José Antônio da Cunha Ponciano Gomes <sup>1</sup>

<sup>1</sup> Laboratório de Corrosão - Labcorr – PEMM/COPPE/UFRJ CEP: 21941-972, Rio de Janeiro, RJ  
e-mail: janaina@metalmat.ufrj.br  
e-mail: ponciano@metalmat.ufrj.br

### RESUMO

Os inibidores naturais são obtidos a partir de extratos de plantas ou de material biodegradável e acarretam a redução da intensidade de dissolução dos metais, diminuindo a sua taxa de corrosão. Pesquisas realizadas nos últimos anos relatam que muitos vegetais apresentam, em sua constituição, compostos com ação antioxidante, principalmente polifenóis. Nesse trabalho, será apresentado o histórico do desenvolvimento de inibidores naturais a partir de extratos de frutas para aplicação em meios neutros e ácidos realizado no Laboratório de Corrosão da COPPE, Labcorr/COPPE/UFRJ. Os extratos analisados foram casca de laranja, casca de manga, casca de maracujá, casca de caju, semente de mamão e bagaço de uva. Os extratos foram obtidos por três metodologias diferentes de extração: extração por infusão, extração por gradiente de polaridade e extração hidroalcoólica. As eficiências de inibição dos extratos testados foram obtidas através de ensaios de perda de massa. O meio neutro estudado simula a composição da água dos sistemas de resfriamento industrial com elevado ciclo de concentração, com 1050 ppm de cloreto, 450 ppm de íon cálcio e 160 ppm de íon bicarbonato e com pH 7,5. Os extratos tiveram um bom desempenho nos dois meios estudados. O extrato concentrado de bagaço de uva teve a melhor eficiência de inibição nos ensaios de perda de massa em 72 horas de imersão no meio neutro, cujo valor foi 74%. A eficiência dos inibidores estudados foi mais significativa em meio de ácido clorídrico  $1 \text{ mol} \cdot \text{L}^{-1}$ , com eficiências superiores a 93% em 24 horas de imersão.

**Palavras-chave:** Corrosão, Inibidor natural, Meio salino, Meio ácido e Aço-carbono.

### ABSTRACT

The corrosion inhibitors are obtained from natural plant extracts or biodegradable material, and cause a reduction in the intensity of dissolution of metals by lowering their corrosion. Research conducted in recent years report that many plants have, in their constitution, compounds with antioxidant activity, mainly polyphenols. This paper will present the history of the development of natural inhibitors from fruit extracts for application in neutral and acid media carried out in Labcorr / COPPE / UFRJ. The orange peel, mango peel, passion fruit peel, cashew peel, papaya seed and grape pomace extracts were analyzed. The extracts were obtained by three different extraction methodologies: infusion extraction, polarity gradient extraction and hydroalcohol extraction. The inhibition efficiencies of the extracts tested were obtained by weight-loss tests. The neutral medium studied simulates the composition of water of industrial cooling systems with high concentration cycle, with 1050 ppm of chloride, 450 ppm of calcium and 160 ppm of bicarbonate and pH 7.5. The performance of extracts was good in both media studied. The concentrated grape pomace extracts had the best inhibition efficiency in the weight-loss tests with a period of 72 hours of immersion in neutral medium, whose value was of 74%. The efficiency of these inhibitors was more significant in  $1 \text{ mol} \cdot \text{L}^{-1}$  hydrochloric acid media, with efficiencies above 93% in a period of 24 hours of immersion.

**Keywords:** Corrosion, Natural inhibitor, Neutral media, Acid media and carbon steel.

## 1. INTRODUÇÃO

Devido às exigências ambientais impostas atualmente, para que inibidores de corrosão sejam considerados ambientalmente adequados, existe o crescente interesse pelos antioxidantes naturais de extratos de plantas [1], pois apresentam baixa toxicidade em relação aos antioxidantes sintéticos. Os inibidores naturais são obtidos a partir de extratos de plantas ou de material biodegradável e acarretam a redução da intensidade de dissolução dos metais, diminuindo a sua taxa de corrosão. Segundo FAROOQ e colaboradores [2], os taninos (substâncias encontradas nas plantas) e seus derivados têm sido usados há algum tempo para proteger o aço. Os extratos de plantas são baratos e podem ser obtidos por um simples processo de extração [3], como exemplo, citamos a extração por infusão.

Pesquisas realizadas nos últimos anos relatam que a atividade dos inibidores de corrosão em muitos desses extratos de plantas pode ser devida à presença de constituintes heterocíclicos como alcaloides, flavonoides, ou, igualmente, à presença de taninos, celulose e compostos policíclicos, que podem levar à formação de um filme sobre a superfície metálica, evitando assim a corrosão [4].

Associando a diversidade ao baixo custo no desenvolvimento dos inibidores naturais, os pesquisadores vêm investigando o uso de extratos aquosos de plantas como inibidores de corrosão em diferentes materiais e meios (ácido, básico e neutro). Geralmente, o desempenho desses inibidores tem sido avaliado usando medidas de perda de massa e técnicas eletroquímicas como curvas de polarização e impedância eletroquímica. Muitos metais e ligas, como aço-carbono, níquel e zinco, que são usados em variadas atividades humanas são suscetíveis a diferentes mecanismos de corrosão devido aos meios corrosivos diversos. Assim, El-Etre e colaboradores [5] fizeram um estudo do comportamento em diferentes meios através de técnicas de polarização.

Extratos aquosos de folhas de henna foram testados como inibidores de corrosão para o aço-carbono, níquel e zinco em soluções ácida ( $\text{HCl } 0,1 \text{ mol} \cdot \text{L}^{-1}$ ), básica ( $\text{NaOH } 0,1 \text{ mol} \cdot \text{L}^{-1}$ ) e neutra ( $\text{NaCl } 3,5\%$ ). Os resultados mostraram uma boa eficiência de inibição com o aumento da concentração do extrato em todos os meios estudados, tanto para o aço-carbono quanto para os demais metais. Os principais componentes dos extratos de henna são os compostos aromáticos hidroxilados como os taninos e lawsone (2-hidroxi-1,4-naftilquinona). Os autores interpretaram a ação dos extratos como a de um inibidor misto, com suas moléculas se adsorvendo tanto nos sítios anódicos quanto nos sítios catódicos da superfície metálica.

Existem muitos estudos utilizando produtos naturais como inibidores de corrosão, a maior parte deles referindo-se à corrosão do aço-carbono, pois este material é amplamente utilizado devido ao seu baixo custo, propriedades mecânica adequadas, facilidade de processamento e elevada disponibilidade [6]. Além do trabalho já citado, estudos sobre a corrosão de outros materiais podem ser mencionados, como por exemplo, a corrosão do alumínio utilizando a baunilha como inibidor em meio ácido [7] e utilizando extratos de talos de figueira-da-índia também em meio ácido [8]; a corrosão do estanho utilizando mel natural e suco de rabanete preto como inibidores em meio aquoso de NaCl a 3% [9] e para a corrosão do aço SX 316 utilizando o extrato de sementes de bisnaga em meio ácido [10].

A abordagem sobre inibidores verdes na literatura objetiva quase sempre as aplicações em meios ácidos, enquanto que o desempenho em meios neutros tem sido pouco estudado, havendo por isso a necessidade de um melhor entendimento dos mecanismos envolvidos no processo de inibição destes compostos em meios neutros. Os seguintes trabalhos podem ser destacados cujo enfoque foi o estudo da corrosão do aço-carbono em meio ácido: folhas e sementes de fenacho (*Trigonella foenum-graecum*) [11], cálice das flores de rosela (*Hibiscus sabdariffa*) [12], folhas de pimenta da Guiné (*Piper guinensis*) [13], cascas de banana (*Musa acuminata*) [14] sementes de fava-de-santo-inácio (*Strychnos nux-vomica*) [15], folhas de limão (*Citrus aurantifolia*) [16], goma da palmeira ráfia (*Raphia hookeri*) [17], folhas de gandarusa (*Justicia gendarussa*) [18], folhas de henna (*Lawsonia inermis*) [19], tremoços (*Lupinus albus* L.) [20], folhas de curry (*Murraya koenigii*) [21-22], folhas de jasmim-de-inverno (*Jasminum nudiflorum* Lindl.) [23], cascas de frutas (laranja, maracujá, manga e caju) [24]. Dentre os trabalhos citados anteriormente podemos referenciar o de QURAISSI e colaboradores [22] que investigaram a inibição da corrosão do aço-carbono em soluções de ácido clorídrico pelo extrato aquoso de folhas de curry (*Murraya koenigii*). Foi estudado o efeito da temperatura, do tempo de imersão e da concentração do ácido sobre o comportamento da corrosão do aço-carbono. Os resultados obtidos mostraram que o extrato de folhas de curry pode atuar como um inibidor eficaz da corrosão do aço-carbono em ácido clorídrico, visto que a eficiência de inibição (EI%) obtida foi de 97 % para uma concentração de  $600 \text{ mg} \cdot \text{L}^{-1}$  de inibidor. SATAPATHY e colaboradores [18] investigaram o efeito de inibição de corrosão do extrato de folhas de gandarusa (*Justicia gendarussa*), encontrada em regiões da Índia, em aço-carbono imerso em meio de  $\text{HCl } 1 \text{ mol} \cdot \text{L}^{-1}$ . Os resultados foram relevantes, mostrando que este extrato é efetivo na redução de corrosão do aço-carbono em meio de ácido clorídrico na faixa de temperatura de 25-70 °C.

A EI% aumenta com o aumento da concentração de inibidor, sendo encontrada uma eficiência de inibição de 93% utilizando-se uma concentração de 150 ppm do extrato, à temperatura de 25 °C.

Outra lacuna tecnológica dentro dessa linha de pesquisa é a existência de poucos trabalhos que ressaltam a importância do reaproveitamento dos resíduos industriais como fonte de potenciais inibidores de corrosão. Os polifenóis presentes nos subprodutos agroindustriais são produtos com potencial valor agregado, com aplicação como aditivos alimentícios naturais e agentes que previnem doenças. Antioxidantes fenólicos funcionam como sequestradores de radicais e algumas vezes como quelantes de metais [25]. Os seguintes trabalhos seguem essa abordagem utilizando extratos de subproduto como inibidores de corrosão para aço-carbono em meio ácido: casca de banana [14], casca de fruta (laranja, manga, maracujá e caju) [24], borra de café [26], casca de manga e laranja [27], semente de mamão [28], cascas e sementes de mamão [29] e cascas de alho [30]. A inserção de uma tecnologia de extração dentro de uma cadeia de produção já consolidada e detentora de escala é um requisito considerado como básico nessa linha de trabalho. Dessa forma, visto que a quantidade de resíduos gerada é muito grande, agregar valor aos subprodutos pode ser interessante do ponto de vista econômico, científico e tecnológico.

Nesse trabalho será apresentado o histórico do desenvolvimento de inibidores naturais a partir de extratos de resíduos de frutas para aplicação em meios neutros e ácidos realizado no Labcorr/COPPE/UFRJ [24, 31-37]. Além disso, serão abordadas questões relativas ao baixo custo, adequação ambiental e desafios futuros ao desenvolvimento de inibidores naturais como inibidor de corrosão.

## **2. MATERIAIS E MÉTODOS**

A descrição dos procedimentos usados para preparação dos extratos naturais utilizados como inibidores de corrosão será abordada no tópico 2.1, apresentando as três diferentes metodologias estudadas no Labcorr ao longo da trajetória desta linha de pesquisa no laboratório. Estes foram obtidos por extração hidroalcoólica com concentração do extrato através de sistema piloto de nanofiltração, extração por infusão com liofilização e extração por gradiente de polaridade.

Para um melhor entendimento do efeito inibidor desses extratos os resultados de ensaios gravimétricos realizados serão comparados em diferentes meios e inibidores. Dessa forma, o procedimento para a execução de tal ensaio será abordado nos tópicos 2.2 e 2.3. A caracterização da superfície após o ensaio de imersão será apresentada nos dois meios estudados para o extrato hidroalcoólico de bagaço de uva concentrado, sendo o procedimento utilizado na análise morfológica relatado no tópico 2.4.

### **2.1 Obtenção dos extratos naturais**

#### **2.1.1 Extração hidroalcoólica com concentração do extrato através de sistema piloto de nanofiltração**

O bagaço de vinho branco oriundo da Vinícola Aurora de Bento Gonçalves/RS foi previamente rehidratado em água destilada, razão sólido:líquido de 2:1, por uma hora a 30 °C. A extração dos compostos bioativos de interesse foi conduzida 120 minutos sob agitação mecânica de 48 rpm e temperatura controlada de 50°C em tacho encamisado, empregando-se uma solução aquosa contendo 30% de etanol com o pH ajustado para 3,8 com ácido cítrico na proporção de 9:1. A separação das frações foi realizada em centrífuga de cestos com rotação de 37,5 g utilizando como meio filtrante uma malha de nylon de 150 µm. Este extrato foi concentrado em sistema piloto de nanofiltração até atingir um fator de concentração volumétrica de 8. O extrato utilizado é proveniente da vinificação em branco da uva tinta Pinot noir, neste processo o bagaço não segue junto com o mosto para a fermentação. Dessa forma, o bagaço estaria mais íntegro, pois este processo é menos agressivo para a matéria prima. Esse extrato foi preparado pela EMBRAPA Agroindústria de Alimentos e cedido para estudo como inibidor de corrosão.

#### **2.1.2 Extração por infusão com liofilização**

A manga e o caju foram obtidos em terrenos de particulares situados em São João de Meriti, Baixada Fluminense-RJ, enquanto a laranja, o maracujá e o mamão foram obtidos no comércio varejo da mesma localidade. A laranja, manga, maracujá e caju foram lavados em água corrente, descascados e as cascas foram secadas ao ar e trituradas utilizando um liquidificador. As sementes do mamão foram secas ao ar e antes de efetuar as extrações, as sementes de mamão foram trituradas com auxílio de almofariz e pistilo. Os extratos foram obtidos por infusão em água. Para realizar a infusão, uma massa de aproximadamente 5g de cada componente estudado dos vegetais foi adicionada em um becher contendo 100 mL de água destilada quente recém-fervida e deixou-se em repouso por 30 minutos, fora de aquecimento, agitando-se esporadicamente. Após a extração,

foi feita uma filtração a vácuo e a liofilização. Esta última foi empregada para remover a água, visando obter um extrato sólido.

### 2.1.3 Extração por gradiente de polaridade

O outro método utilizado para obter o extrato de cascas de frutas foi a extração por gradiente de polaridade (gp), esta foi utilizado apenas para a casca de manga e laranja. Para a obtenção dos extratos, utilizou-se aproximadamente uma massa de 5 g, que foi adicionada a um refil confeccionado para extração a quente em um aparelho tipo soxhlet. Foram realizadas extrações com solventes de polaridade crescente: hexano, acetato de etila e etanol, para finalmente realizar a extração em água destilada por infusão. O volume de solvente (hexano, acetato de etila e etanol) utilizado em cada extração foi de 180 mL. Cada extração, com um determinado solvente, foi realizada até que a solução do copo do soxhlet ficasse incolor, o que representou um tempo variável para cada extrato. Para cada troca de solvente no aparelho soxhlet, a massa residual, obtida da extração anterior, foi seca ao ar livre por 24 horas antes da próxima extração.

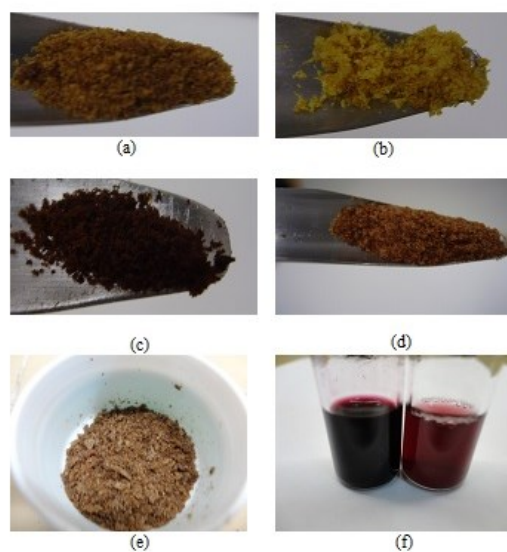

**Figura 1:** Extratos obtidos (a) infuso liofilizado de casca de manga, (b) casca de laranja, (c) casca de caju, (d) casca de maracujá, (e) semente de mamão e (f) hidroalcoólico de bagaço de uva (bruto e concentrado).

Os extratos das cascas das frutas e semente de mamão obtidos por infusão aquosa após a liofilização foram guardados em dessecador até o momento da análise. Os extratos de bagaço de uva foram armazenados em geladeira. A **Figura 1** mostra as imagens dos extratos prontos.

### 2.2 Meio corrosivo estudado

Foram empregados no presente trabalho reagentes de pureza analítica. Todas as soluções foram preparadas a partir de água destilada. O meio estudado neste trabalho foi uma solução aquosa naturalmente aerada de ácido clorídrico P. A. (Merck)  $1 \text{ mol} \cdot \text{L}^{-1}$ . E também uma solução com elevada concentração de cloreto (1050 ppm) e cálcio (450 ppm) já estudada anteriormente com inibidores convencionais [38], a qual adicionou-se bicarbonato (160 ppm) e o pH foi ajustado para 7,5, simulando uma água característica do sistema de refrigeração com elevado ciclo de concentração. Os ensaios foram realizados na ausência e presença dos extratos naturais.

### 2.3 Ensaios Gravimétricos

Foram realizados ensaios gravimétricos em diferentes tempos de imersão para o aço-carbono SAE 1020 em meio ácido e neutro utilizando inibidores de corrosão naturais para avaliar a eficiência de inibição dos extratos obtidos através de diferentes metodologias de extração.

Os corpos-de-prova para os ensaios de perda de massa foram confeccionados na forma de retângulos de aproximadamente  $16 \text{ cm}^2$ . Os corpos-de-prova utilizados nos ensaios em meio ácido foram lixados até a

lixa de granulometria 600 mesh e em seguida foram lavados com água destilada e acetona, e secos com jato de ar quente. A massa inicial foi determinada logo após ser feita a medida da área, em balança analítica, com precisão de quatro casas decimais. Para cada condição de tempo de imersão, foram utilizados dois corpos-de-prova. Os corpos-de-prova utilizados nos ensaios em solução neutra foram preparados por jateamento com areia. Após pesagem, foram inseridos nas células contendo a solução de interesse. Os corpos-de-prova permaneceram imersos durante 24 e 72 horas, onde, após este tempo foram retirados da solução, decapados em solução de Clark (preparada com 1 litro de HCl concentrado, 20 gramas de  $Sb_2O_3$  e 50 gramas de  $SnCl_2$ ) por 20 segundos, secos em jatos de ar quente e então pesados novamente. Foram utilizados três corpos-de-prova, sendo que a taxa de corrosão foi calculada pela média aritmética de dois corpos-de-prova, e um foi guardado para servir de controle para a perda de massa proveniente da decapagem.

As medidas de perda de massa foram obtidas segundo a norma ASTM G31-72 (1999) que padroniza a metodologia para a utilização desta técnica em laboratório. A velocidade do processo corrosivo foi expressa a partir do cálculo da taxa de corrosão, em milímetros por ano (mm/ano), mediante a seguinte equação:

$$W_{corr} = \left( \frac{K \times M}{A \times t \times \rho} \right) \quad (1)$$

Onde K representa uma constante ( $8,76 \times 10^4$ ), M a perda de massa em g, A a área exposta em  $cm^2$ , t o tempo de exposição em horas, e  $\rho$  a massa específica do material em  $g/cm^3$ , para o aço-carbono a massa específica é igual a  $7,86 g \cdot cm^{-3}$ .

Os cálculos das eficiências de inibição (EI%) a partir dos resultados dos ensaios de perda de massa foram obtidos da seguinte forma:

$$EI\% = \left( \frac{W_{semextrato} - W_{comextrato}}{W_{semextrato}} \right) \times 100 \quad (2)$$

## 2.4 Análise da superfície

Os corpos-de-prova utilizados na análise morfológica foram tratados superficialmente com lixas d'água com granas de 400, 500 e 600 mesh. Em seguida, foram lavados com água destilada, álcool e secos com jato de ar quente. E estes foram imersos por 4 horas em meio de ácido clorídrico  $1 \text{ mol L}^{-1}$  na ausência e presença de 2% do extrato concentrado de bagaço de uva. Após esse período, os corpos-de-prova foram retirados e lavados com água destilada e álcool. Para não prejudicar a análise morfológica estes foram colocados no ultrassom para retirar impurezas na superfície e secos em jato de ar frio. Esta análise também foi realizada em meio neutro com 72 horas de imersão, seguindo a mesma metodologia citada anteriormente. Para tal, utilizou-se o microscópio eletrônico de varredura Leo 940A (ZEISS), com voltagem de aceleração de 20 kV.

## 3. RESULTADOS E DISCUSSÃO

Os estudos sobre inibidores naturais, verdes ou ecologicamente amigáveis começaram a ser desenvolvidos como linha de pesquisa no Laboratório de Corrosão- Labcorr/COPPE/UFRJ no ano de 2007. Os primeiros extratos desenvolvidos foram obtidos a partir de cascas de frutas através das extrações por infusão aquosa [24, 34] e por gradiente de polaridade [31, 34]. Os extratos obtidos foram avaliados através de medidas eletroquímicas, tais como impedância eletroquímica e curvas de polarização anódicas e catódicas em diferentes concentrações, ensaios gravimétricos e análise morfológica para determinação do mecanismo de corrosão. A influência da temperatura na adsorção das moléculas inibidoras sobre a superfície do aço-carbono também foi estudada.

Os resultados encontrados mostraram que os extratos dos resíduos de cascas de frutas atuam como inibidores de corrosão para o aço-carbono em meio de ácido clorídrico  $1 \text{ mol} \cdot \text{L}^{-1}$ . Os valores de taxa de corrosão para o aço-carbono em meio ácido na ausência e presença de inibidor natural obtidos nos ensaios gravimétricos durante 24 horas de imersão a  $25^\circ\text{C}$  são mostrados na Tabela 1, observa-se uma alta eficiência para todos os inibidores testados, variando de 93 a 97%. Esta tabela exemplifica o histórico dos resultados encontrados em meio ácido com os inibidores naturais desenvolvidos no Labcorr através dos ensaios gravimétricos. Os inibidores estudados foram os extratos obtidos por infusão [24, 34]: cascas de manga, casca de laranja,

casca de maracujá, casca de caju, cuja concentração estudada foi de 400 ppm; os extratos obtidos por gradiente de polaridade [31, 34]: casca de manga gp, casca de laranja gp e os extratos obtidos por extração hidroalcoólica [32, 33]: bagaço de uva bruto e concentrado, cuja concentração foi 2%. Os extratos que apresentaram melhor eficiência no meio estudo foram de casca de manga gp e o hidroalcoólico de bagaço de uva concentrado, com eficiência de 97%.

**Tabela 1:** Taxa de corrosão obtida para o aço-carbono em meio ácido, na ausência e presença de diferentes extratos naturais durante 24 horas de imersão a 25 °C.

| Inibidor                       | Taxa de corrosão, mm/ano | Eficiência, % |
|--------------------------------|--------------------------|---------------|
| Sem inibidor                   | 19,39                    | -             |
| Casca de manga                 | 0,854                    | 96            |
| Casca de laranja               | 0,913                    | 95            |
| Casca de maracujá              | 0,707                    | 96            |
| Casca de caju                  | 1,42                     | 93            |
| Casca de manga gp              | 0,520                    | 97            |
| Casca de laranja gp            | 0,890                    | 95            |
| Extrato de bagaço de uva bruto | 1,23                     | 94            |
| Extrato de bagaço concentrado  | 0,557                    | 97            |

Os valores de taxa de corrosão para o aço-carbono em meio neutro na ausência e presença de inibidores naturais obtidos nos ensaios gravimétricos durante 24 e 72 horas de imersão a 25°C são mostrados na **Tabela 2**, observa-se que a eficiência variou entre 20-74%. Os inibidores estudados em meio neutro foram os extratos obtidos por infusão: casca de laranja e semente de mamão, cujas concentrações estudadas foram 400 ppm e 200 ppm, respectivamente; e os extratos obtidos por extração hidroalcoólica: bagaço de uva bruto e concentrado, cuja concentração foi 2%. Considerando o tempo de imersão de 24 horas, o extrato de semente de mamão apresenta o melhor resultado e com o aumento do tempo de imersão ocorre uma diminuição da eficiência deste extrato. Enquanto que a eficiência do extrato hidroalcoólico concentrado de bagaço de uva aumenta com o tempo, atingindo o valor máximo de eficiência em meio neutro, de 74% em 72 horas de imersão. A eficiência máxima alcançada no meio neutro foi inferior nos tempos de imersão estudados em relação aos ensaios gravimétricos realizados em meio ácido.

**Tabela 2:** Taxa de corrosão obtida para o aço-carbono em solução neutra, na ausência e presença de diferentes extratos naturais durante 24 e 72 horas de imersão a 25 °C.

| Inibidor de corrosão                          | Taxa de corrosão, mm/ano |        | Eficiência, % |      |
|-----------------------------------------------|--------------------------|--------|---------------|------|
|                                               | 24 h                     | 72 h   | 24 h          | 72 h |
| Sem inibidor                                  | 0,149                    | 0,101  | -             | -    |
| Extrato infuso de casca de laranja            | 0,112                    | 0,0604 | 25            | 40   |
| Extrato infuso de Semente de mamão            | 0,0511                   | 0,0573 | 66            | 43   |
| Extrato hidroalcoólico de bagaço de uva bruto | 0,107                    | 0,0805 | 28            | 20   |



|                                                        |        |        |    |    |
|--------------------------------------------------------|--------|--------|----|----|
| Extrato hidroalcoólico de bagaço<br>de uva concentrado | 0,0604 | 0,0263 | 59 | 74 |
|--------------------------------------------------------|--------|--------|----|----|

A superfície do aço-carbono após a imersão por 4 horas em meio ácido na ausência e presença 2% de extrato hidroalcoólico de bagaço de uva concentrado pode ser vista na Figura 2 a-b, enquanto que na Figura 2c-d foi apresentada a superfície após a imersão no meio neutro por 72 horas na ausência e presença do mesmo inibidor de corrosão. A superfície mais lisa em presença dos extratos em ambos os meios é observada, sendo possível ver as marcas da lixa.

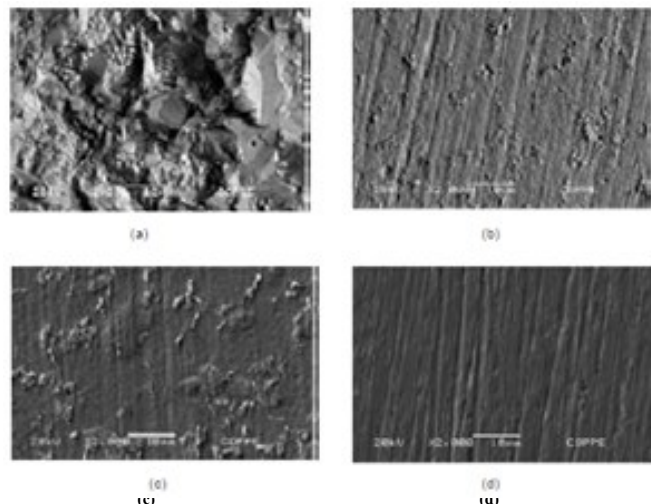

**Figura 2:** Imagens obtidas no Microscópio eletrônico de varredura (x2.000) do aço-carbono: (a) superfície após imersão em meio ácido por 4 horas, (b) com 2% de extrato concentrado de bagaço de uva, (c) superfície após imersão em solução neutra por 72 horas (d) com 2% de extrato concentrado de bagaço de uva.

Outra questão pertinente e importante estudada em nosso grupo na linha de pesquisa supracitada de inibidores naturais é a estabilidade dos extratos naturais com o tempo de armazenagem (estabilidade de prateleira) e a estabilidade dos filmes formados sobre a superfície do aço-carbono com o tempo de imersão. Monteiro [35] mostrou através de ensaios de impedância eletroquímica que o extrato de bagaço de uva concentrado foi estável até o tempo máximo estudado que foi de 72 horas de imersão com uma eficiência de inibição de aproximadamente 70%, sugerindo que a adsorção das moléculas inibidoras na superfície metálica é mantida constante ao longo do tempo.

Trabalhos futuros na área estão relacionados a importância da caracterização do filme formado sobre a superfície metálica em pH neutro e ácido, através de técnicas de superfície tais como a espectroscopia Raman *in situ* e XPS. Bem como a caracterização da composição química dos extratos, elucidando assim a molécula responsável pelo processo inibitório ou a ocorrência de sinergismo entre as diferentes substâncias presentes no extrato. Outro gargalo tecnológico para a aplicabilidade dos extratos naturais como inibidores de corrosão está calcado no aumento de escala necessário para a comercialização deste como produto, e esta etapa está diretamente ligada à cadeia produtora do resíduo que irá abastecer a produção em escala de forma que não torne o processo dispendioso à indústria em questão. E para finalizar o levantamento de novas abordagens ao estudo de inibidores naturais, existe a necessidade de ensaios de toxicidade para confirmar a adequação ambiental da proposta, visto que mesmo sendo originados a partir de extratos de plantas ou resíduos industriais podem apresentar algum grau de agressividade ao meio ambiente.

#### 4. CONCLUSÕES

- Os inibidores de corrosão naturais são mais efetivos em meio ácido com eficiência máxima de 97% tomando como parâmetros os resultados obtidos nos ensaios gravimétricos.

- O melhor efeito inibidor em meio neutro foi obtido pelo extrato de bagaço de uva concentrado com eficiência de 74%. Este extrato teve uma alta eficiência em meio ácido (97%). A metodologia de extração utilizada foi a hidroalcoólica com concentração de compostos fenólicos através de uma membrana de nanofiltração.
- Através dos resultados apresentados é possível constatar que os resíduos da indústria alimentícia podem ser utilizados como potenciais inibidores de corrosão, tanto em meio ácido quanto neutro. No entanto, mais estudos são requeridos em meio neutro para uma melhor adequação do inibidor natural.
- Os diferentes métodos de extração utilizados apresentaram bons resultados nos ensaios realizados. Dessa forma, é possível desenvolver inibidores de corrosão a partir de resíduos da indústria de alimentos com baixo custo utilizando um simples processo de extração por infusão.
- A adequação ambiental da proposta está vinculada a ensaios de toxicidade que comprovem que os extratos naturais apresentam agressividade mínima ao meio ambiente e ao homem.
- Estudos complementares para verificação da estabilidade de prateleira do produto com o tempo de estocagem, estabilidade do inibidor na superfície metálica e no meio empregado para a determinação do tempo de resiliência do mesmo no sistema, assim como estudos para viabilizar a produção do extrato em maior escala com intuito de utilizá-lo em plantas piloto são questões relevantes para a aplicabilidade dos inibidores naturais como inibidores de corrosão.

## 5. AGRADECIMENTOS

Agradecemos ao suporte financeiro dado pelo CnPq através do fomento das bolsas de mestrado e doutorado. Agradecemos à Embrapa pelo inibidor cedido para o estudo em questão.

## 6. BIBLIOGRAFIA

- [1] VALEK, L. M. "Copper corrosion inhibitor by *Azadirachta indica* leaves extract in 0,5 M sulfuric acid", *Materials Letters*, v. 61, n.1, pp. 148-151, Jan. 2007.
- [2] FAROOQ, I. H., SAINI, P.A., QUARAISHI, M.A. "Recent Trends in Cooling Water Inhibitors", *Corrosion 2000 – Paper N° 00332*, Mar. 2000.
- [3] EL-ETRE, A. Y., 2008, "Inhibition of C-steel corrosion in acidic solution using the aqueous extract of zallouh root", *Materials Chemistry and Physics*, v.108, n. 2-3, pp. 278–282, Apr. 2008.
- [4] RAJA, P. B., SETHURAMAN, M. G., "Inhibitive effect of black pepper extract on the sulphuric acid corrosion of mild steel", *Materials Letters*, v.62, pp. 2977-2979, Jun. 2008.
- [5] EL-ETRE, A. Y., ABDALLAH, M., EL-TANTAWWY, Z. E., "Corrosion Inhibition of Metals Using *Lawsonia* Extract", *Corrosion Science*, v. 47, n.2, pp. 385-395, Feb. 2005.
- [6] LI, X., DENG, S., FU, H., "Inhibition by *Jasminum nudiflorum* Lindl. leaves extract of the corrosion of cold rolled steel in hydrochloric acid solution", *Journal Applied Electrochemistry*, v. 40, n. 9, pp. 1641-1649, Sept. 2010.
- [7] EL-ETRE A. Y., "Inhibition of acid corrosion of aluminum using vanillin", *Corrosion Science*, v.43, n.6, pp.1031-1039, Jun. 2001.
- [8] EL-ETRE A. Y., "Inhibition of aluminum using *Opuntia* extract", *Corrosion Science*, v. 45, n.11, pp. 2485-2495, Nov. 2003.
- [9] RADOJCIC, I., BERKOVIC, K., KOVAC, S., *et al.*, "Natural honey and black radish juice as tin corrosion inhibitors", *Corrosion Science*, v. 50, n.5, pp. 1498–1504, May.2008.
- [10] EL-ETRE A. Y., "Khilla Extract as Inhibitor for acid Corrosion of SX 316 Steel", *Applied Surface Science*, v. 252, n.24, pp. 8521-8525, Oct. 2006.
- [11] NOOR, E. A., "Comparative study on the corrosion inhibition of mild steel by aqueous extracts of fenugreek seeds and leaves in acidic solutions", *Journal Engineering and Applied Sciences*, v.3, n.1, pp. 23-30, Jan. 2008.
- [12] OGUZIE, E. E., "Corrosion Inhibitive Effect and Adsorption Behaviour of *Hibiscus Sabdariffa* Extract on Mild Steel in Acidic Media", *Portugaliae Electrochimica Acta*, v. 26, n. 3, pp. 303-314, Feb. 2008.
- [13] EBENSO, E. E., EDDY, N. O., ODIONGENYI, A., "Corrosion inhibitive properties and adsorption behaviour of ethanol extract of *Piper guinensis* as a green corrosion inhibitor for mild steel in H<sub>2</sub>SO<sub>4</sub>", *African Journal of Pure and Applied Chemistry*, v. 2 n. 11, pp. 107-115, Nov.2008.



- [14] EDDY, N.O., ODOEMELAM, S.A, ODIONGENYI, A.O. “Ethanol Extract of *Musa acuminata* peel as an eco-friendly inhibitor for the corrosion of mild steel in H<sub>2</sub>SO<sub>4</sub>”, *Advances in Natural and Applied Sciences*, v. 2, n. 1, pp. 35-42, 2008.
- [15] RAJA, P. B., SETHURAMAN, M. G. “Strychnos nux-vomica an eco-friendly corrosion inhibitor for mild steel in 1 M sulfuric acid medium”, *Materials and Corrosion*, v. 60, n. 1, pp. 22-28, Jan. 2009.
- [16] SARATHA, R., PRIYA, S.V., THILAGAVATHY, P., “Investigation of *Citrus aurantiifolia* Leaves Extract as Corrosion Inhibitor for Mild Steel in 1 M HCl”, *E-Journal of Chemistry*, v. 6, n. 3, pp. 785-795, Feb. 2009.
- [17] UMOREN, S. A., OBOT, I. B., OBI-EGBEDI, N. O. “Raphia hookeri gum as a potential eco-friendly inhibitor for mild steel in sulfuric acid”, *Journal of the Materials Science*, v. 44, pp. 274–279, Jan. 2009.
- [18] SATAPATHY, A.K., GUNASEKARAN, G., SAHOO, S.C., *et al.*, “Corrosion inhibition by *Justicia gendarussa* plant extract in hydrochloric acid solution”. *Corrosion Science*, v. 51, n.12, pp. 2848–2856, Dec. 2009.
- [19] OSTOVARI, A., HOSEINIEH, S.M., PEIKARI, M., *et al.*, “Corrosion inhibition of mild steel in 1 M HCl solution by henna extract: A comparative study of the inhibition by henna and its constituents (Lawsonic acid, Gallic acid, a-D-Glucose and Tannic acid)”, *Corrosion Science*, v. 51, n.9, pp. 1935–1949, Sept. 2009.
- [20] ABDEL-GABER, A.M., ABD-EL NABEY, B.A., SIDAHMED, I.M., *et al.*, “Effect of Temperature on Inhibitive Action of Damsissa Extract on the Corrosion of Steel in Acidic Media”, *CORROSION*, v. 62, n. 4, pp. 293-299, Apr.2006.
- [21] SHAEMILA, A., PREMA, A. A., SAHAYARAJ, P. A. “Influence of *Murraya koenigii* (Curry leaves) extract on the corrosion inhibition of carbon steel in HCl solution”, *Rasayan Journal of Chemistry*. 3, n.1, pp. 74-81, 2010.
- [22] QURAIISHIB, M.A., SINGHA, A., SINGHA, V. K., *et al.*, “Green approach to corrosion inhibition of mild steel in hydrochloric acid and sulphuric acid solutions by the extract of *Murraya koenigii* leaves”. *Materials Chemistry and Physics*, v. 122, n.1, pp. 114–122, July 2010.
- [23] LI, X., DENG, S., FU, H., “Inhibition by *Jasminum nudiflorum* Lindl. leaves extract of the corrosion of cold rolled steel in hydrochloric acid solution”, *Journal Applied Electrochemistry*, v. 40, n.9, pp. 1641-1649, Sept. 2010.
- [24] ROCHA, J.C., PONCIANO GOMES, J.A.C., D’ELIA, E., Corrosion inhibition of carbon steel in hydrochloric acid solution by fruit peel aqueous extracts, *Corrosion Science*, v. 52, n.7, pp. 2341–2348, July 2010.
- [25] BAGGIO, J., *Avaliação dos resíduos (Casca e pó orgânico) de café (Coffea arabica L.) como provável fonte de substâncias bioativas*, Dissertação de M.Sc, Universidade Federal de Santa Catarina, SC, Brasil, 2006.
- [26] TORRES, V. V., AMADO, R. S., SÁ, C. F., *et al.*, "Inhibitory action of aqueous coffee ground extracts on the corrosion of carbon steel in HCl solution", *Corrosion Science*, v. 53, n.7, pp. 2385–2392, July 2011.
- [27] SALEH, R. M., ISMAIL, A. A., EL HOSARY, A. A., “Corrosion inhibition by naturally occurring substances. vii. the effect of aqueous extracts of some leaves and fruit peels on the corrosion of steel, Al, Zn and Cu in acids,” *British Corrosion Journal*, vol. 17, no. 3, pp. 131–135, 1982.
- [28] ZUCCHI, F. AND OMAR, I.H., “Plant extracts as corrosion inhibitors of mild steel in HCl solution”, *Surface Technology*, v. 24, n. 4), pp 391-399, Apr. 1985.
- [29] OKAFOR, P. C., EBENSO, E. E., “Inhibitive action of *Carica papaya* extracts on the corrosion of mild steel in acidic media and their adsorption characteristics”, *Pigment & Resin Technology*, v. 36, n.3, pp. 134-140, 2007.
- [30] PEREIRA, S. S. A. A., PÊGAS, M. M., FERNÁNDEZ, T. L., *et al.*, "Inhibitory action of aqueous garlic peel extract on the corrosion of carbon steel in HCl solution", *Corrosion Science*, v. 65, pp. 360-366, Jun. 2012.
- [31] ROCHA, J.C., J.C., PONCIANO GOMES, J.A.C., D’ELIA, E, “Aqueous Extracts of Mango and Orange Peel as Green Inhibitors for Carbon Steel in Hydrochloric Acid Solution”, *Materials Research*, v.17, n. 6, pp.1581-1587, Nov./Dez. 2014.
- [32] ROCHA, J.C., J.C., PONCIANO GOMES, J.A.C., D’ELIA, E, *et al.*, “Grape Pomace Extracts as Green Corrosion Inhibitors for Carbon Steel in Hydrochloric Acid Solutions”, *International Journal of Electrochemical Science*, v.7, pp. 11941 – 11956, Dec. 2012.

- [33] ROCHA, J.C. *Obtenção de inibidores de corrosão a partir de extratos de produtos naturais*, Tese de D.Sc., COPPE/UFRJ, Rio de Janeiro, RJ, Brasil, 2013.
- [34] ROCHA, J.C. *Aplicação de produtos naturais como inibidores de corrosão em meio ácido*, Dissertação de M.Sc., COPPE/UFRJ, Rio de Janeiro, RJ, Brasil, 2009.
- [35] Monteiro, M.V.C. *Avaliação da estabilidade do extrato de bagaço de uva para aplicação como inibidor de corrosão*, Dissertação de M.Sc., COPPE/UFRJ, Rio de Janeiro, RJ, Brasil, 2014.
- [36] ROCHA, J. C., PONCIANO GOMES, J. A. C., D'ELIA, E. Patente: Privilégio de Inovação. Número do registro: PI0902012-8 A2, título: "Aplicação de extratos de cascas de frutas como inibidores de corrosão e processo de obtenção dos mesmos", 2009, Brasil.
- [37] ROCHA, J. C., PONCIANO GOMES, J. A. C., D'ELIA, E. United States Patent, Patent number: US8,926,867B2, "Use of fruit skin extracts as corrosion inhibitors and process for producing same", Jan.6, 2015.
- [38] SOUZA, E.A. *Avaliação de inibidores de corrosão para sistemas de resfriamento industrial operando com elevado ciclo de concentração*, Dissertação de M.Sc., Universidade Federal do Rio de Janeiro, RJ, Brasil, 2007.
